# Supplementary material
Source: publisher site journal article supplement (https://www.dovepress.com/article/400745)
Supplement: Supplementary file 1 [file get_supplementary_file.php]

**Physical examination**

**Friedman tongue position was assessed to evaluate oropharyngeal crowding by asking the patient to sit upright with their head in a neutral position and having them open their mouth without sticking their tongue out[16].**

**Grade 1: tonsils, pillars, and soft palate were clearly visible;**

**Grade 2: the uvula, pillars, and upper pole were visible;**

**Grade 3: only part of the soft palate was visible; the tonsils, pillars, and base of the uvula could not be seen;**

**Grade 4: only the hard palate was visible.**

**The Brodsky tonsil grading scale is depended on the percentage of oropharyngeal airway occupied by the tonsils[17]. Moreover, tonsil hypertrophy is the tonsil occupying more than 50%(Grade 3 and Grade 4).**

**Grade 1: Tonsils sit just outside of the tonsillar fossa with obstruction of less than 25 percent of the airway;**

**Grade 2: Tonsils are readily seen in the airway-25 to 50 percent of the airway is obstructed;**

**Grade 3: Tonsils denote a 50 to 75 percent obstruction of the airway;**

**Grade 4: Tonsils involve a greater than 75 percent obstruction of the airway.**

**The adenoid grading scale is dependent on the percentage of posterior naris occupied by the adenoid assessed by nasal endoscopy or fiberoptic laryngoscopy[17]. Moreover, our study defines adenoid hypertrophy as the adenoid occupying more than 75%(Grade 4).**

**Grade 1: adenoid occupy ≤ 25% of the posterior naris occupied;**

**Grade 2: adenoid occupy > 25% and ≤ 50% of the posterior naris occupied;**

**Grade 3: adenoid occupy > 50% and ≤ 75% of the posterior naris occupied;**

**Grade 4: adenoid occupies> 75% of the posterior naris occupied.**

**The pharyngeal grade was used to estimate the degree of pharyngeal narrowing by asking the patient to sit upright with their head in a neutral position and having them open their mouth without sticking their tongue out. Furthermore, use the tongue depressor if necessary. The pharyngeal narrowing is based on the intersection of palatopharyngeal arches and tongue width[18].**

**Grade 1: palatopharyngeal arch intersects at the edge of the tongue;**

**Grade 2:palatopharyngeal arch intersects at ≥ 25% of the tongue diameter;**

**Grade 3: palatopharyngeal arch intersects at ≥ 50% of the tongue diameter;**

**Grade 4: palatopharyngeal arch intersects at ≥ 75% of the tongue diameter.**

**Table S1 Demographic between the participants**

|  | Excluded participants(n=26) | Included participants(n=145) | *p* value |
| --- | --- | --- | --- |
| Age(years) | 8.28±1.91 | 7.88±1.76 | **0.277** |
| Gender(Male/%) | 17, 65.4% | 95, 63.4% | **1.000** |
| BMI(z score) | 0.88±1.21 | 0.52±1.24 | **0.176** |

**
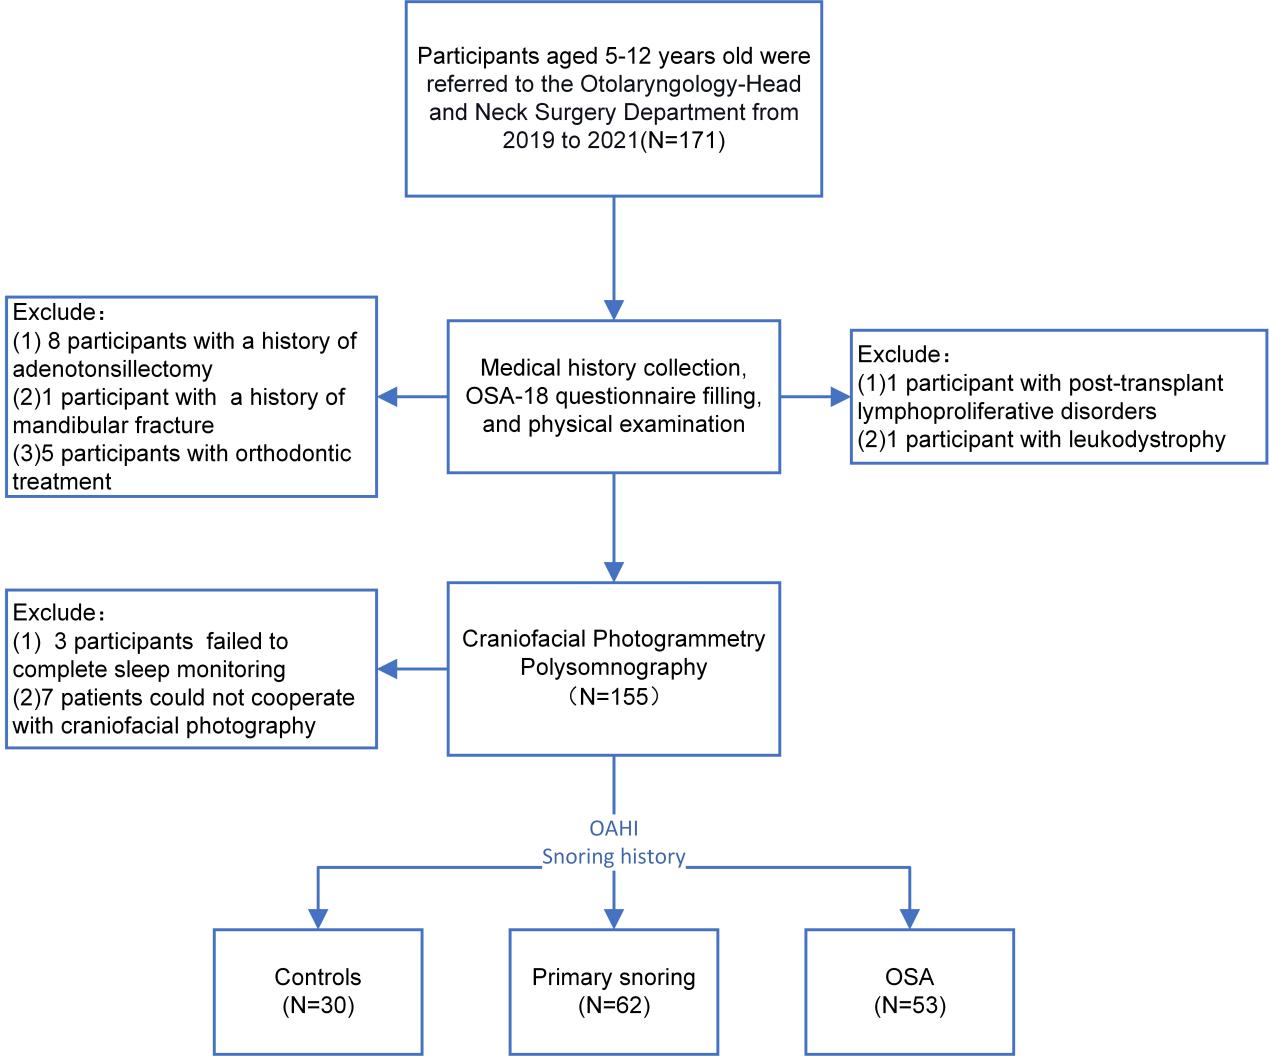
**

**Figure S1 Flow diagram of participant selection**

**Table S2 Sleep-related symptoms between the participants**

| **OSA-18** | Controls(n=30) | PS (n=62) | OSA(n=53) | *p* value |
| --- | --- | --- | --- | --- |
| 1. **Loud snoring** | **2.50[1.75, 3.00]** | **4.00[4.00, 5.00]*†*** | **5.00[4.00, 6.00]*‡*** | **<0.001** |
| 1. **Breath holding/pauses** | **1.00[1.00, 2.00]** | **2.00[1.00, 3.00]*†*** | **3.00[2.00, 4.00]*‡*** | **<0.001** |
| **3. Choking or gasping** | **1.00[1.00, 2.00]** | **2.00[1.00, 3.00]*†*** | **2.00[1.00, 3.50]*‡*** | **<0.001** |
| **4. Fragmented sleep** | **4.00[2.00, 5.00]** | **4.00[3.75, 5.00]** | **5.00[3.00, 6.00]*‡*** | **0.013** |
| **5. Mouth breathing** | **5.00[4.00, 5.00]** | **5.00[4.00, 6.00]** | **5.00[4.00, 6.50]** | **0.784** |
| 1. **Frequent colds or upper respiratory tract infections** | **4.00[2.00, 4.00]** | **4.00[3.00, 5.00]** | **4.00[3.00, 5.00]** | **0.087** |
| **7. Rhinorrhea** | **3.00[1.75, 4.00]** | **4.00[3.00, 5.00]*†*** | **4.00[2.00, 4.00]** | **0.010** |
| **8. Dysphagia** | **1.00[1.00, 1.25]** | **1.00[1.00, 2.00]** | **1.00[1.00, 2.50]** | **0.202** |
| **9. Mood swings or tantrums** | **3.00[2.00, 4.00]** | **4.00[3.00, 5.00]** | **4.00[2.00, 4.00]** | **0.540** |
| **10. Aggression/hyperactivity** | **2.00[1.00, 3.25]** | **3.00[2.00, 4.00]** | **2.00[1.00, 4.00]** | **0.173** |
| **11. Discipline problems** | **2.00[1.00, 3.00]** | **3.00[1.00, 4.00]** | **3.00[1.00, 4.00]** | **0.113** |
| **12. Daytime drowsiness** | **1.00[1.00, 2.25]** | **2.00[1.00, 3.00]*†*** | **2.00[1.00, 3.00]** | **0.009** |
| **13. Poor attention span** | **4.00[1.00, 5.00]** | **4.00[3.00, 5.00]** | **4.00[2.00, 5.00]** | **0.281** |
| **14. Difficulty awakening** | **4.00[2.75, 5.00]** | **4.00[3.00, 5.00]** | **4.00[2.00, 5.00]** | **0.415** |
| **15. Caregiver worried over child health** | **5.00[3.75, 7.00]** | **5.00[4.00, 7.00]** | **5.00[4.00, 7.00]** | **0.297** |
| **16. Caregiver concerned not enough air** | **4.00[2.00, 5.00]** | **5.00[4.00, 6.00]** | **5.00[4.00, 7.00]*‡*** | **0.011** |
| **17. Caregiver missed activities** | **2.00[1.00, 3.25]** | **3.50[2.00, 4.00]** | **3.00[1.00, 4.00]** | **0.064** |
| **18. Caregiver frustration** | **4.00[2.00, 5.00]** | **4.50[4.00, 6.00]** | **4.00[3.00, 5.00]** | **0.250** |

Note:

**The bold text highlights the significant differences between the three groups.**

† =P<0.05 between PS group and control group

‡ =p<0.05 between OSA group and control group

**Table S3 The univariate logistic regression for predicting children with obstructive sleep apnea**

|  | OR [95% CI] | *p* value |
| --- | --- | --- |
| **gender** | **0.643[0.313, 1.320]** | **0.229** |
| BMI(z score) | **1.490[1.104, 2.010]** | **0.009** |
| Neck circumference(cm) | **1.112[0.977, 1.266]** | **0.107** |
| Neck-to-height ratio(%) | **1.281[1.025, 1.601]** | **0.029** |
| OSA-18 questionnaire total score | **1.015[0.993, 1.038]** | **0.184** |
| Sleep disturbance(Item1-4) | **1.187[1.087,1.295]** | **<0.001** |
| Physical suffering(Item5-8) | **1.005[0.913, 1.106]** | 0.919 |
| Emotional distress(Item9-11) | 1.015[0.937,1.100] | 0.713 |
| Daytime problems(Item12-14) | 0.957[0.872,1.051] | 0.358 |
| Caregiver concerns(Item15-18) | 1.020[0.960,1.085] | 0.519 |
| Pharyngeal grade | 2.267[1.411, 3.641] | **<0.001** |
| Tonsil hypertrophy | 3.698[1.817, 7.528] | **<0.001** |
| Adenoid hypertrophy | 2.798[1.351, 5.793] | **0.006** |
| **Upper face width(UFW)** | 1.836[1.192, 2.827] | **0.006** |
| **Lower face width(LFW)** | 1.703[1.255, 2.310] | **<0.001** |
| **Lower part of LFH(LLFH)** | 2.370[1.266, 4.436] | **0.007** |
| **LFW/FH** | 0.062[0.004,1.044] | 0.054 |
| **UFH/LFH** | 0.062[0.004, 1.043] | 0.054 |
| **ULFH/LLFH** | 0.005[0.000,0.321] | **0.013** |
| **Facial convexity angle** | 1.063[0.996, 1.135] | 0.067 |
| **Inner-canthus width** | 2.604[0.847, 8.002] | 0.095 |
| **Lateral-canthus width** | 1.795[0.967,3.332] | 0.064 |
| **Nose width** | 4.410[1.174, 16.561] | **0.028** |
| **Lip width** | 2.090[0.948, 4.610] | 0.068 |
| **Nasal-upper lip relationship angle** | 1.008[0.967, 1.049] | 0.715 |
| **Lips relationship angle** | 0.989[0.962, 1.017] | 0.441 |
| **Lower lips-mandibular convexity angle** | 0.986[0.959, 1.013] | 0.311 |
| **Maxillary-mandibular relationship angle(ANB)** | 0.888[0.775, 1.017] | 0.087 |

Note:

**The bold text highlights the significant differences between the three groups.**
